# Supplementary material for: Identification of a Putative Enhancer RNA for EGFR in Hyper-Accessible Regions in Esophageal Squamous Cell Carcinoma Cells by Analysis of Chromatin Accessibility Landscapes
Source: PubMed Central journal article supplement (PMC8554337; doi:10.3389/fonc.2021.724687), 2021-10-15
Supplement: DataSheet_1.pdf [file DataSheet_1.pdf]

**A**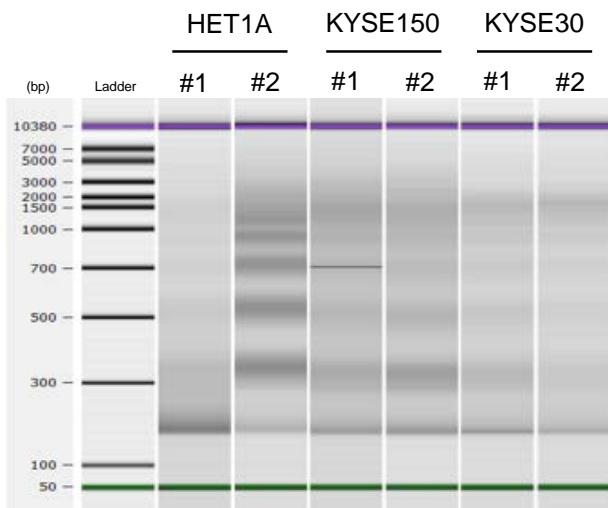**B**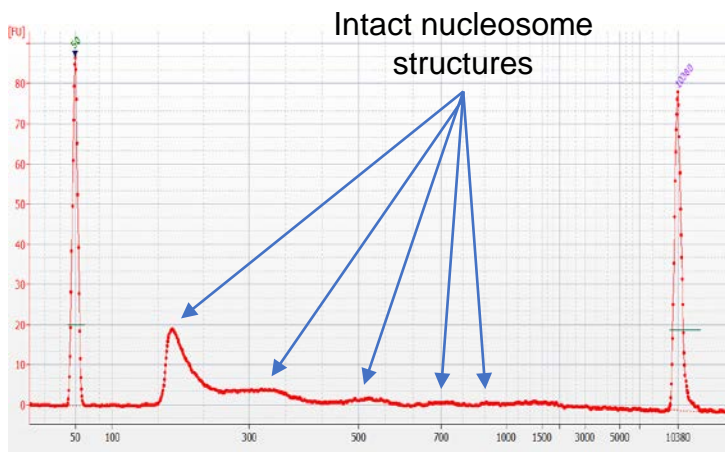**C**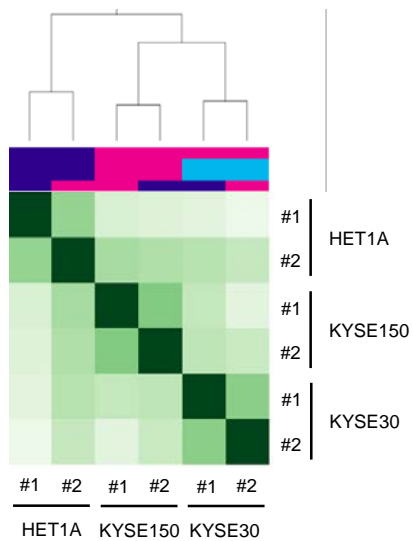**D**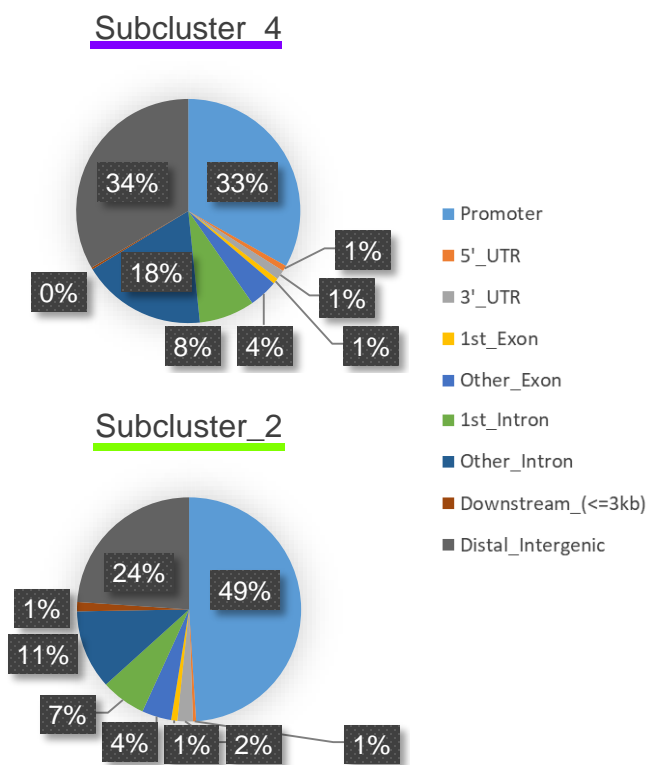

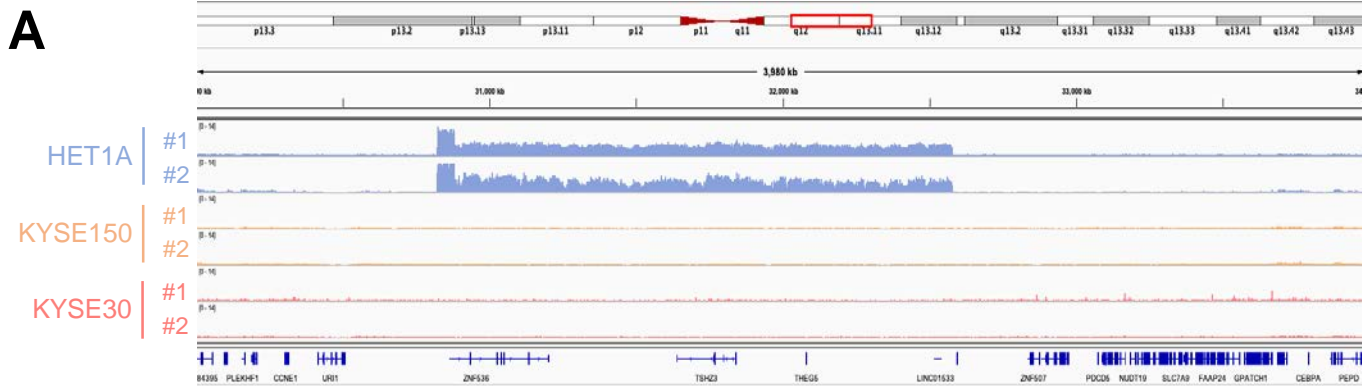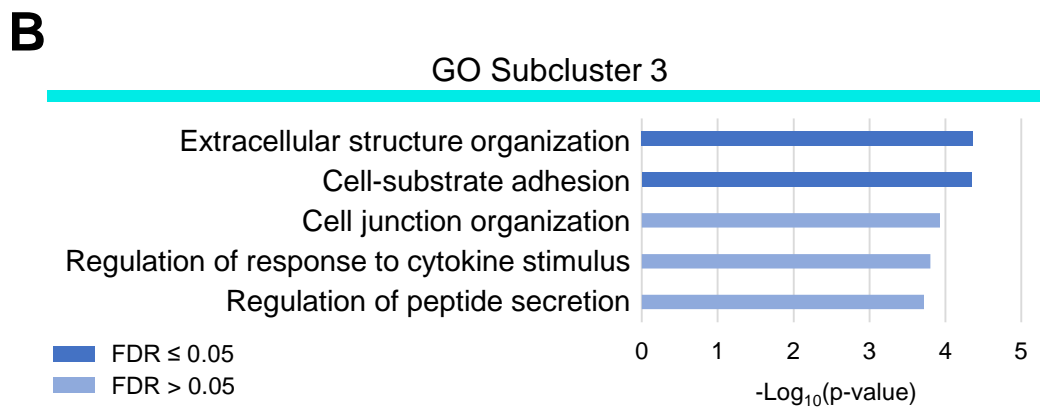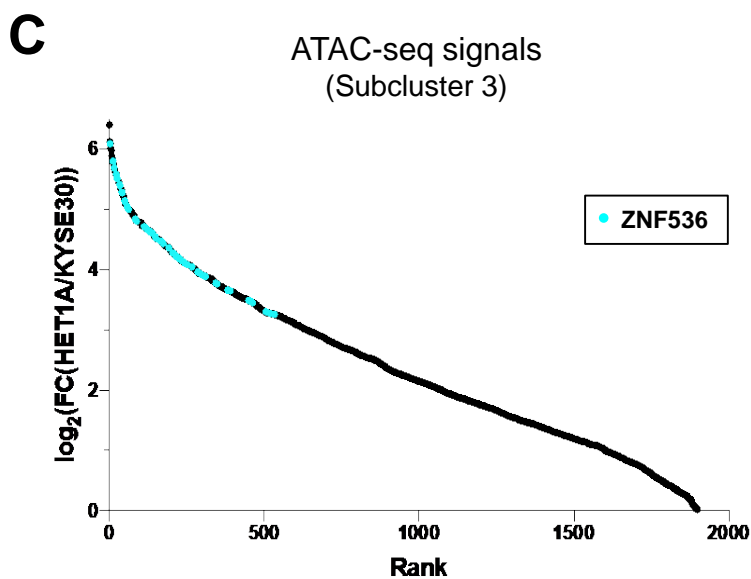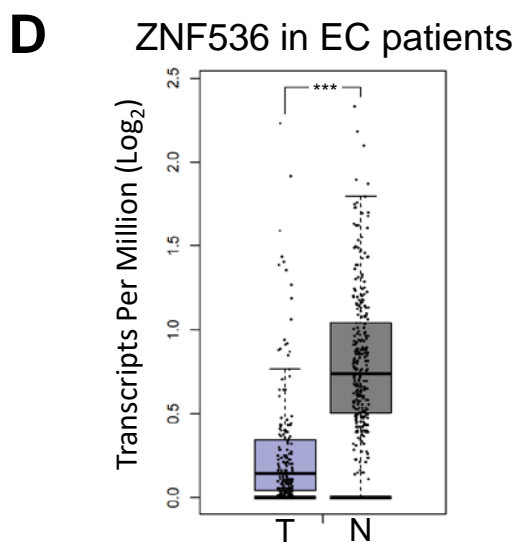

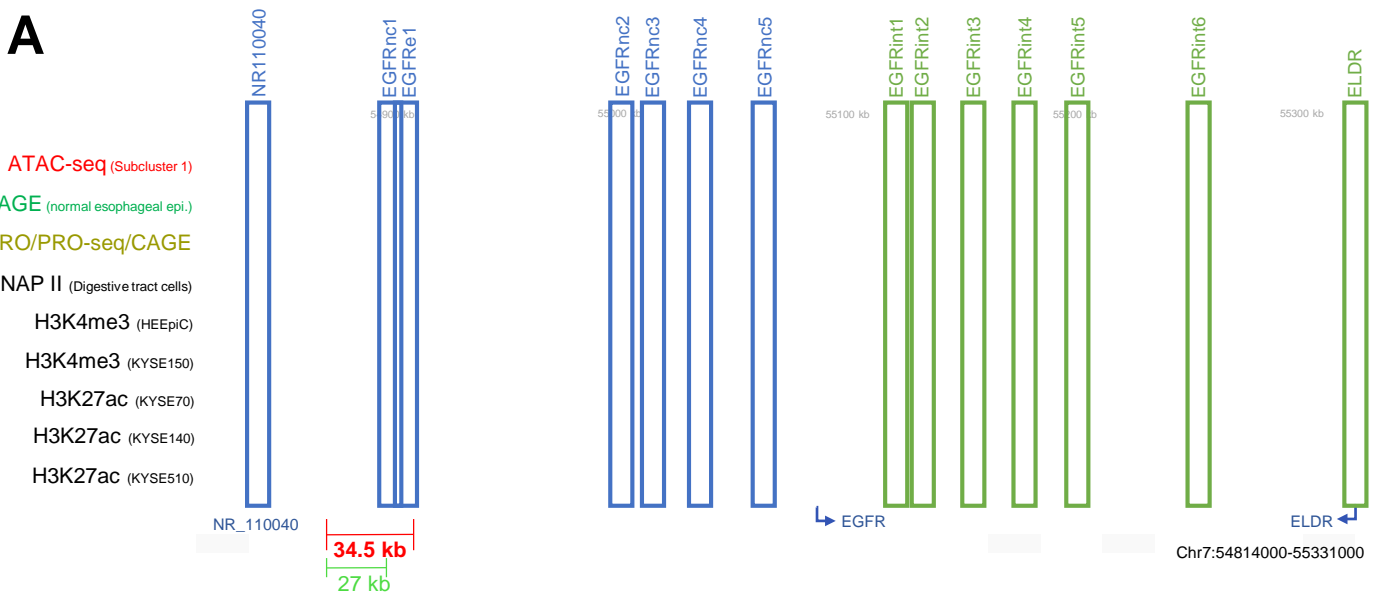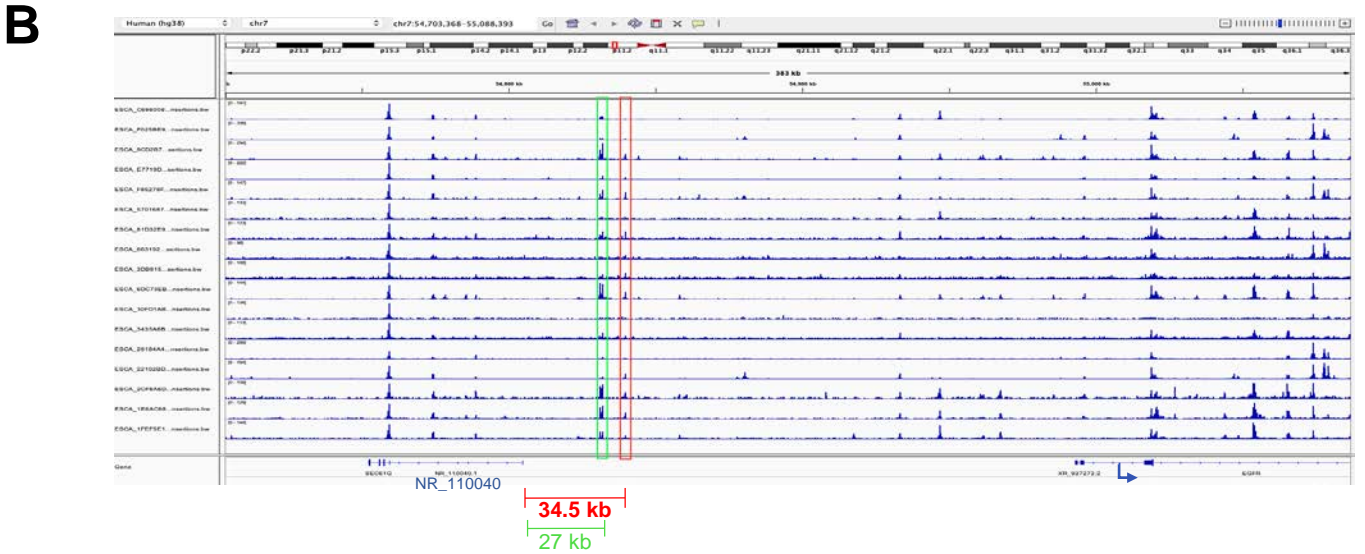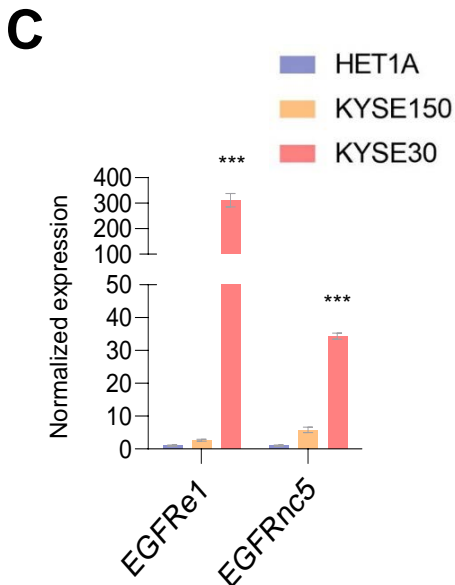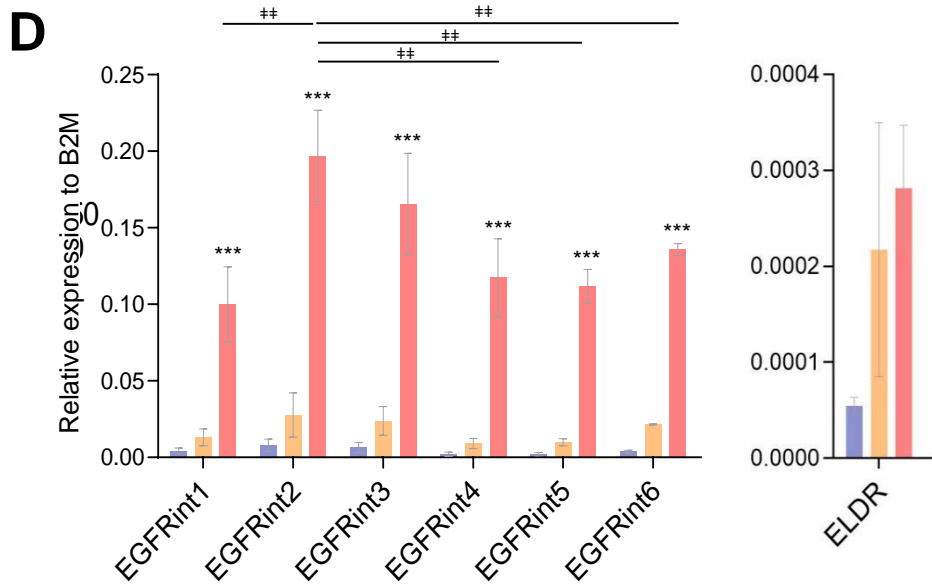

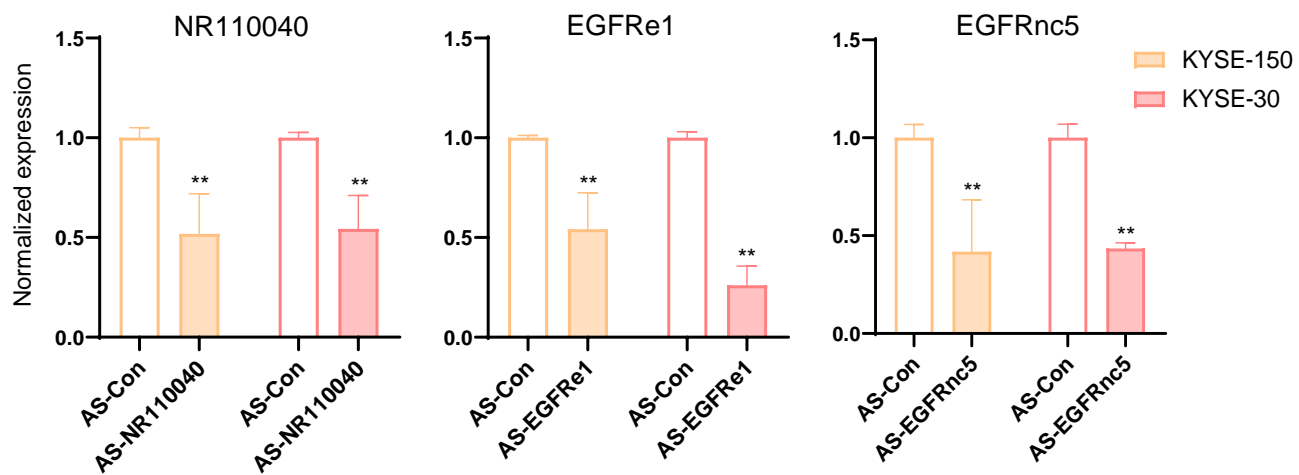

### Subcluster 3

| Rank | Motif                                                                             | P-value | % of Targets | % of Bgd | Known TF                                              |
|------|-----------------------------------------------------------------------------------|---------|--------------|----------|-------------------------------------------------------|
| 1    |  | 1e-183  | 18.64        | 2.64     | FOSL1, BATF, ATF3, FOSL2, JUN, JUNB, JUND, FOS, FOSL2 |
| 2    |  | 1e-19   | 18.43        | 11.22    | FOXA2, FOX, FOXA1, FOXO3, FOXD1, FOXP1, FOXP2         |
| 3    |  | 1e-18   | 1.41         | 0.13     | CTCF, BORIS, RUNX2, ZNF354C, MYCN, USF2, RUNX         |

### Subcluster 2

| Rank | Motif                                                                               | P-value | % of Targets | % of Bgd | Known TF                                 |
|------|-------------------------------------------------------------------------------------|---------|--------------|----------|------------------------------------------|
| 1    |   | 1e-18   | 13.17        | 3.33     | BATF, ATF3, JUN, FOSL2, FOSL1, FOS, JUNB |
| 2    |  | 1e-12   | 13.62        | 4.66     | NFY, NFIC, SOX3, NFYB                    |
| 3    |  | 1e-10   | 28.79        | 16.33    | SP1, KLF5, KLF4                          |

### Subcluster 4

| Rank | Motif                                                                               | P-value | % of Targets | % of Bgd | Known TF                                 |
|------|-------------------------------------------------------------------------------------|---------|--------------|----------|------------------------------------------|
| 1    |  | 1e-29   | 16.53        | 2.52     | BATF, FOSL2, FOSL1, ATF3, JUN, FOS, JUNB |
| 2    |  | 1e-12   | 1.38         | 0.00     | PIT1, HNF1, BATF, JUN                    |
| 3    |  | 1e-11   | 3.03         | 0.12     | PITX1, RELA, REL                         |

**A**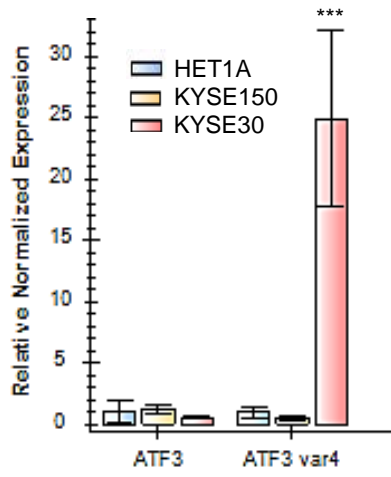**B**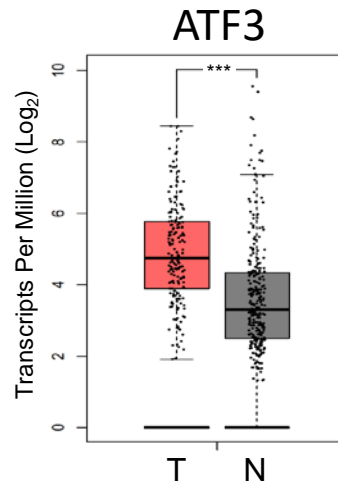

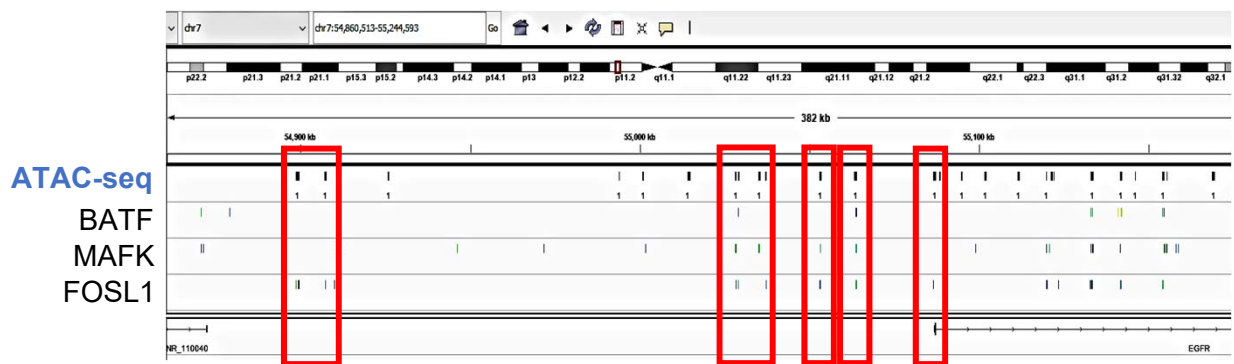

Choi, et al. Figure S7
